# Supplementary material
Source: HighWire-hosted journal article supplement (http://www.cmaj.ca/highwire/filestream/59911/field_highwire_adjunct_files/3/150674-res-4-at.pdf)

**Appendix 4 (as supplied by the authors):** Quarterly numbers of cataract operations, ophthalmology consultations and laser peripheral iridotomy procedures by recent graduates and established ophthalmologists in Ontario, 1994–2013

**Figure A4-1:** Number of cataract operations per quarter by recent graduates and established ophthalmologists in Ontario, 1994-2013

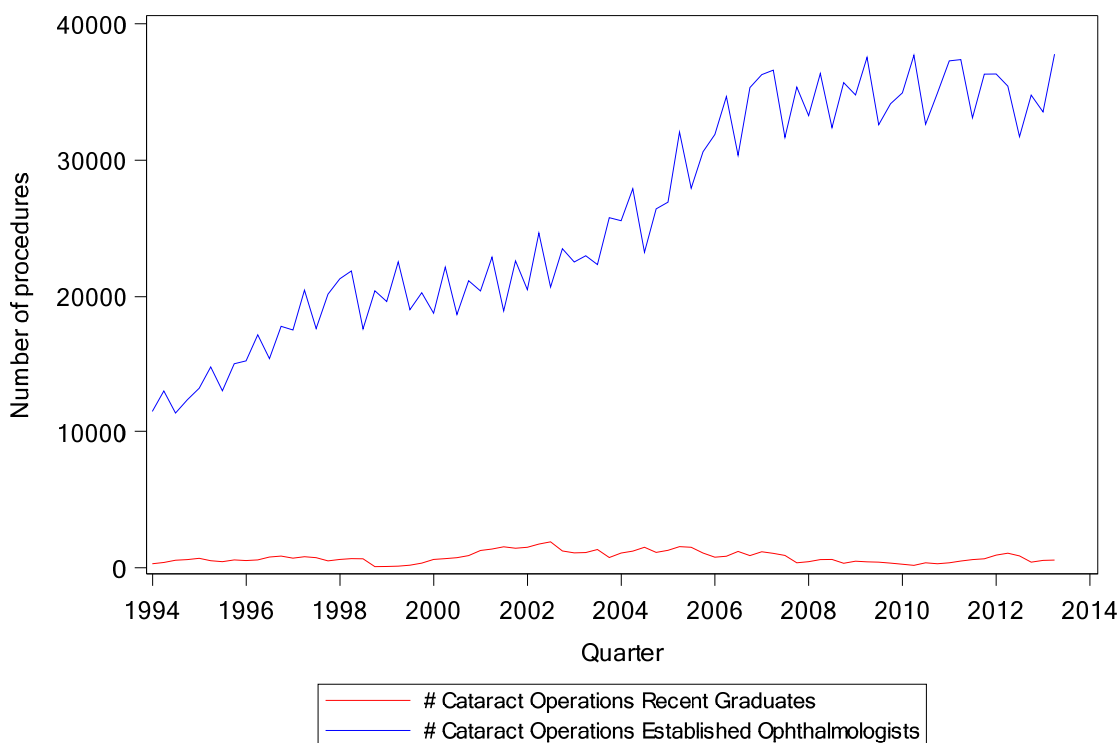

**Figure A4-2:** Number of ophthalmology consultations per quarter by recent graduates and established ophthalmologists in Ontario, 1994-2013

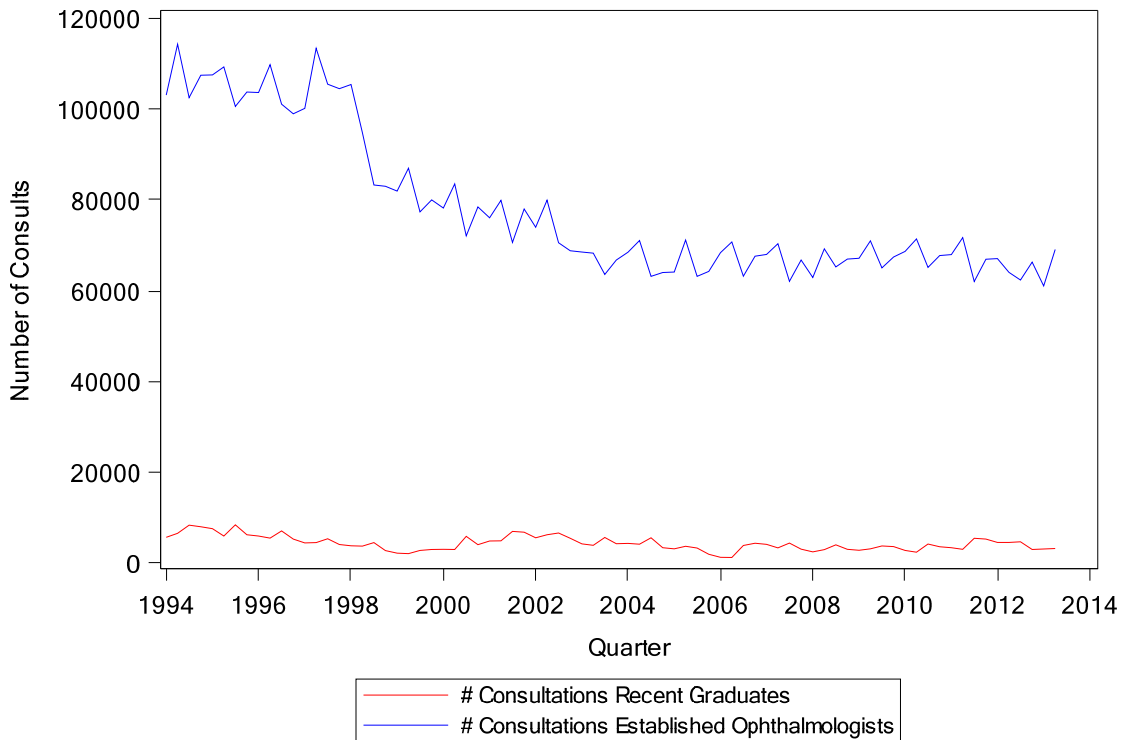

**Figure A4-3:** Number of laser peripheral iridotomy procedures per quarter by recent graduates and established ophthalmologists in Ontario, 1994-2013

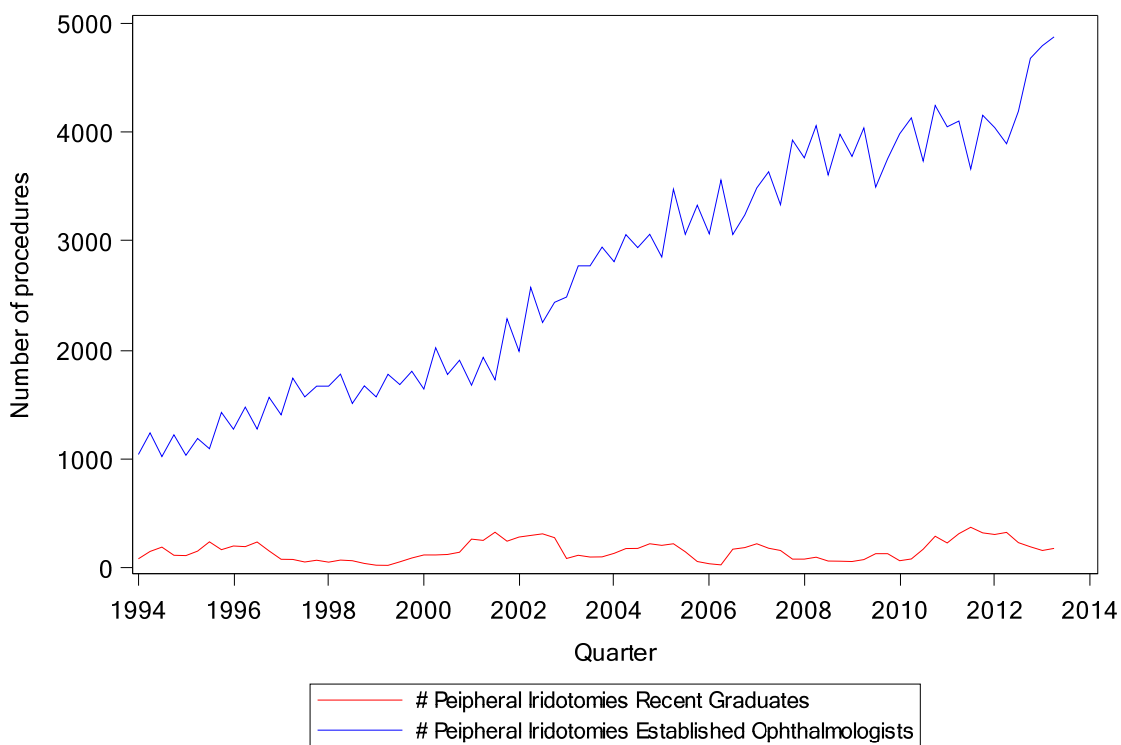

Supplement: 150674-res-4-at.pdf [file 150674-res-4-at.pdf]
